# Supplementary material
Source: Springer Nature journal article supplement (https://www.springermedizin.de/resource/supplementary/12889_2010_2601_MOESM1_ESM.pdf/9486634)

**Distribution (%)  
of groups after two years**

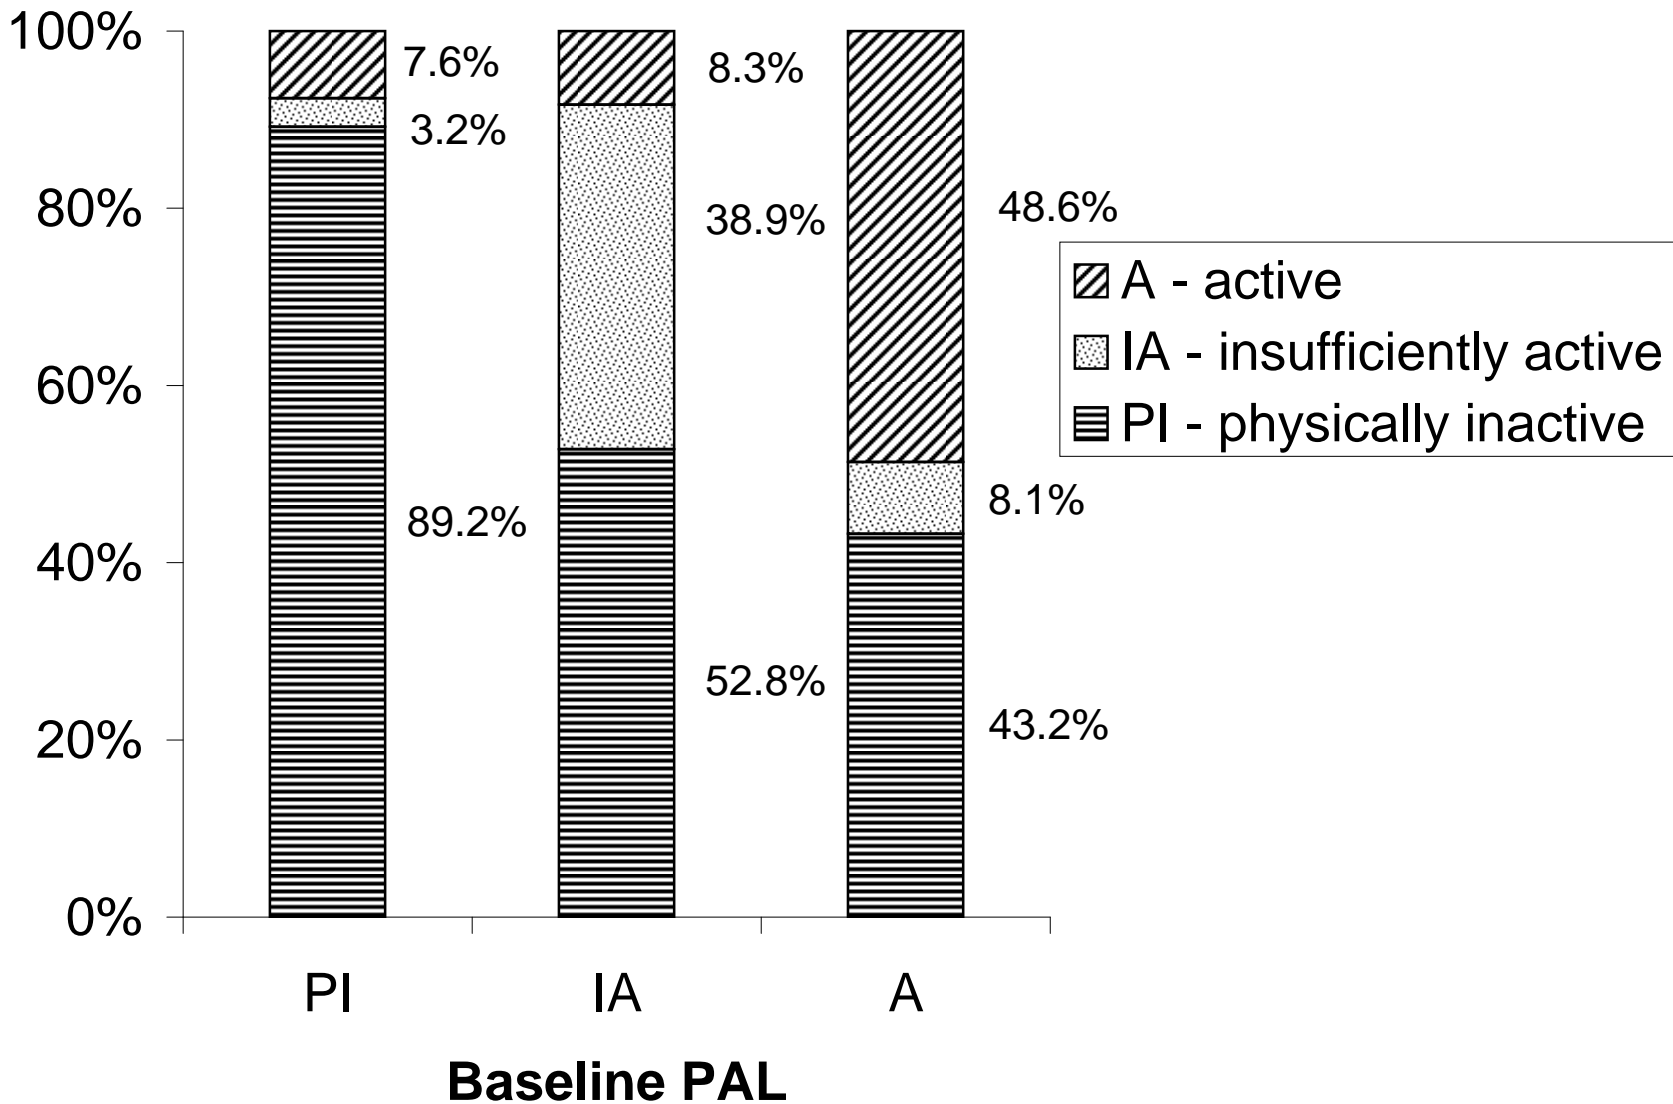

Supplement: MOESM1 [file 9486634]
